# Supplementary material for: Universal access to megastigmanes through controlled cyclisation towards highly substituted cyclohexenes
Source: Royal Society of Chemistry journal article supplement (doi:10.1039/c6ob02587k), 2016-11-29

# A Universal Access to Megastigmanes Through Controlled Cyclization Towards Highly Substituted Cyclohexenes.

José A. González-Delgado,<sup>‡</sup> Miguel A. Romero,<sup>‡</sup> Uwe Pischel and Jesús F. Arteaga\*

CIQSO - Center for Research in Sustainable Chemistry and Department of Chemistry,  
University of Huelva, Campus de El Carmen s/n, 21071 Huelva, Spain.

## Supporting Information

### TABLE OF CONTENTS

#### Spectra

|                                                                       |     |
|-----------------------------------------------------------------------|-----|
| <sup>1</sup> H and <sup>13</sup> C NMR spectra of <b>3</b>            | S-2 |
| <sup>1</sup> H and <sup>13</sup> C NMR spectra of <b>12</b>           | S-3 |
| <sup>1</sup> H and <sup>13</sup> C NMR spectra of <b>13</b>           | S-4 |
| <sup>1</sup> H and <sup>13</sup> C NMR spectra of <b>14</b>           | S-5 |
| <sup>1</sup> H and <sup>13</sup> C NMR spectra of <b>15</b>           | S-6 |
| <sup>1</sup> H and <sup>13</sup> C NMR spectra of <b>7</b>            | S-7 |
| <sup>1</sup> H and <sup>13</sup> C NMR spectra of <b>9</b>            | S-8 |
| <sup>1</sup> H and <sup>13</sup> C NMR spectra of <b>Tectoionol B</b> | S-9 |

#### AUTHOR INFORMATION

##### Corresponding Author

\*(Jesús F. Arteaga) E-mail: [jesus.fernandez@diq.uhu.es](mailto:jesus.fernandez@diq.uhu.es).

##### Author Contributions

<sup>‡</sup>J.A.G.-D. and M.A.R. contributed equally to this work

$^1\text{H}$  and  $^{13}\text{C}$  NMR spectra of **3**

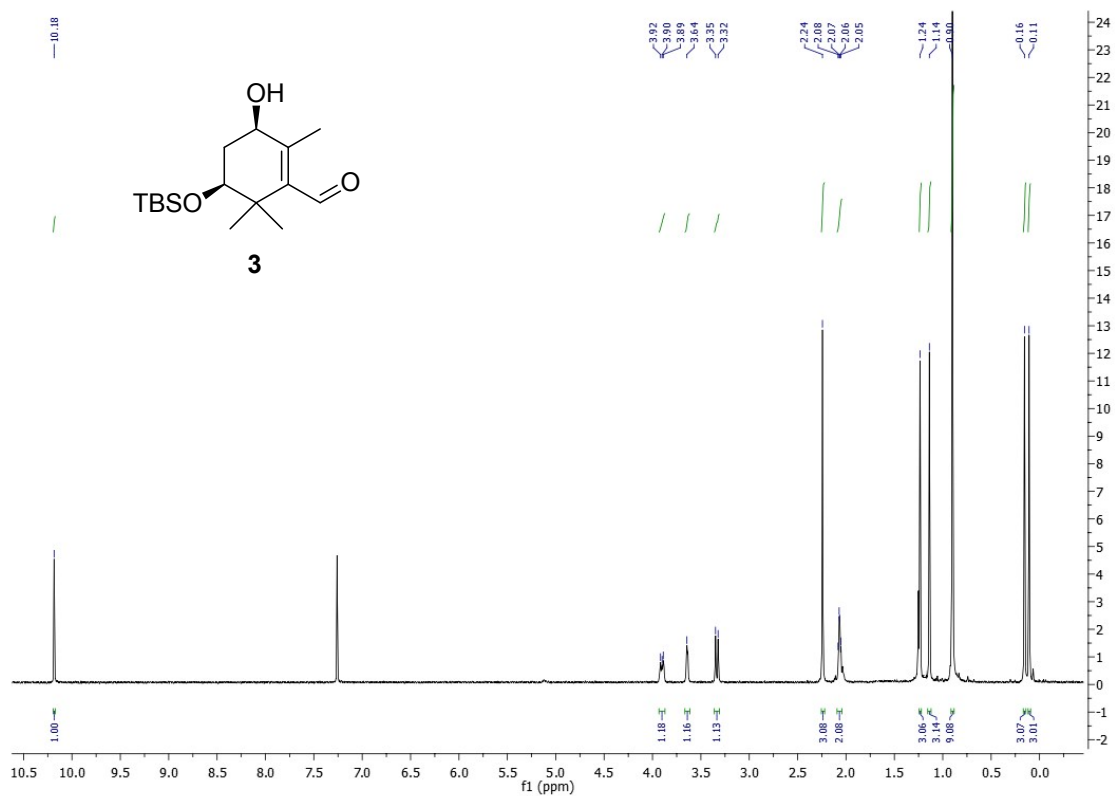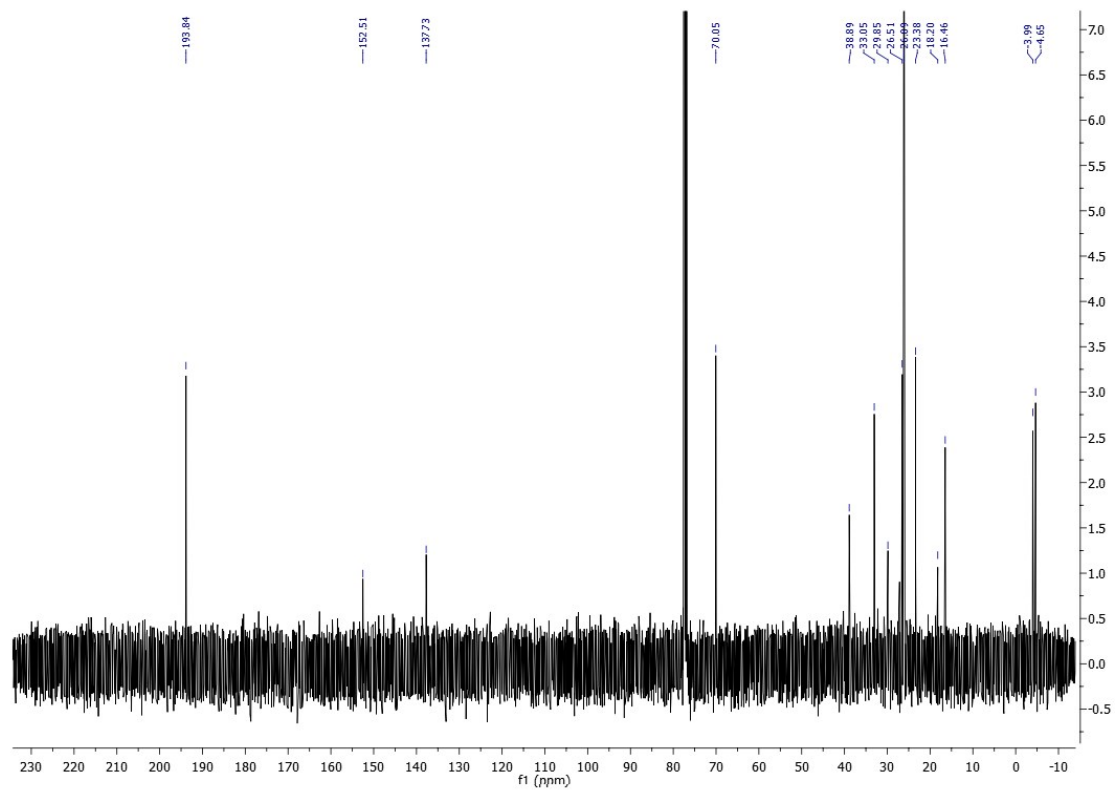

$^1\text{H}$  and  $^{13}\text{C}$  NMR spectra of **12**

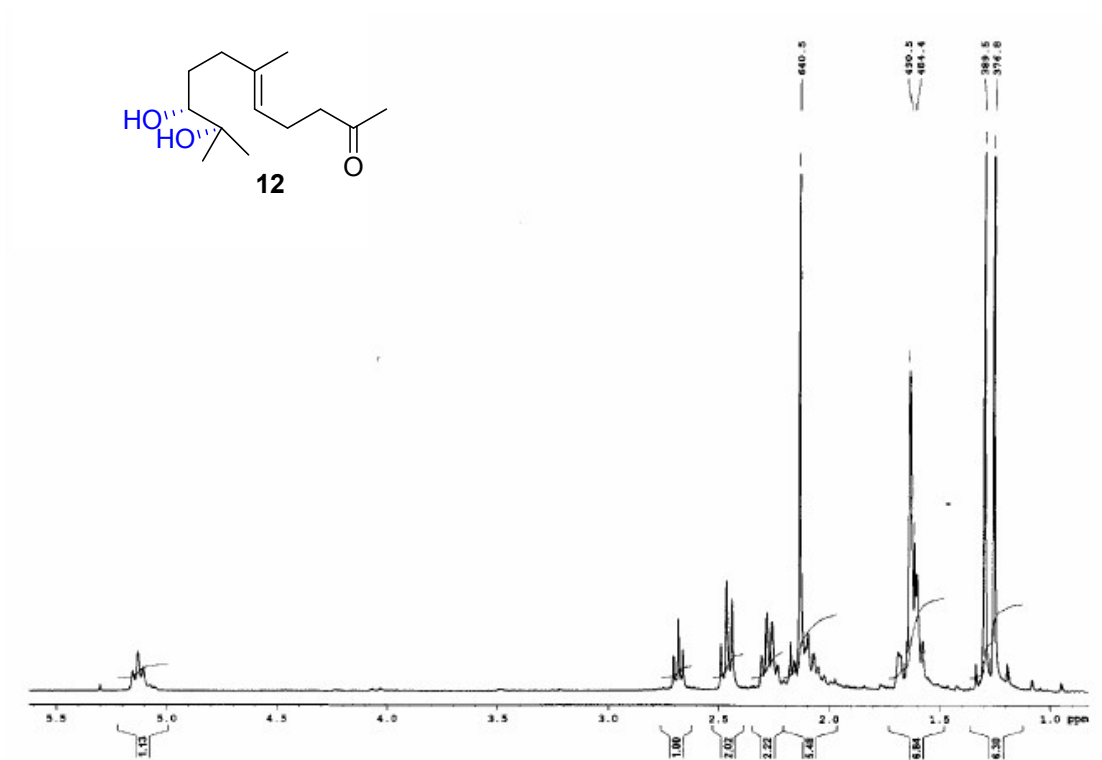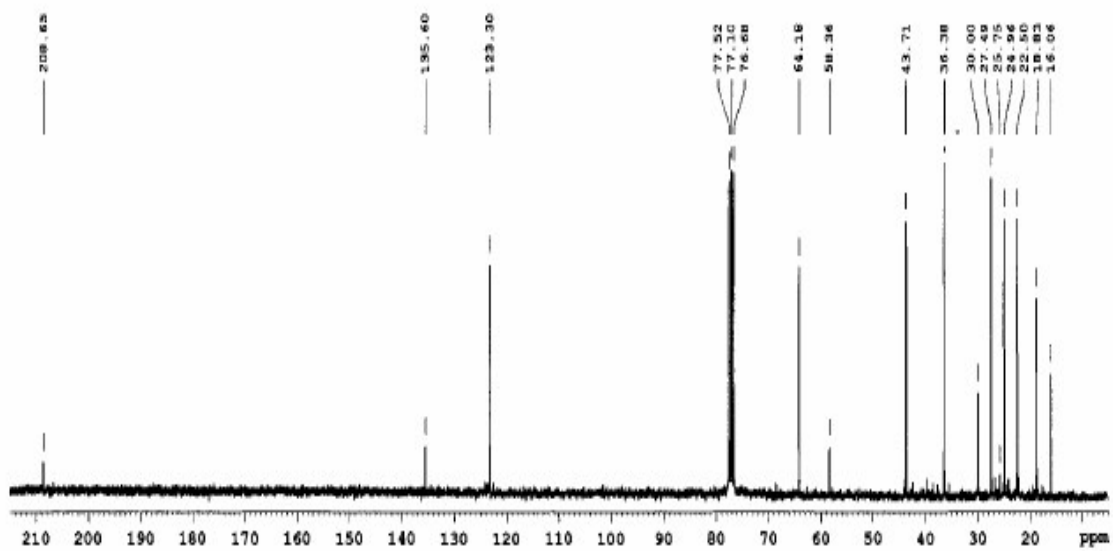

# $^1\text{H}$ and $^{13}\text{C}$ NMR spectra of **13**

JOS\_426\_22  
STANDARD PROTON PARAMETERS

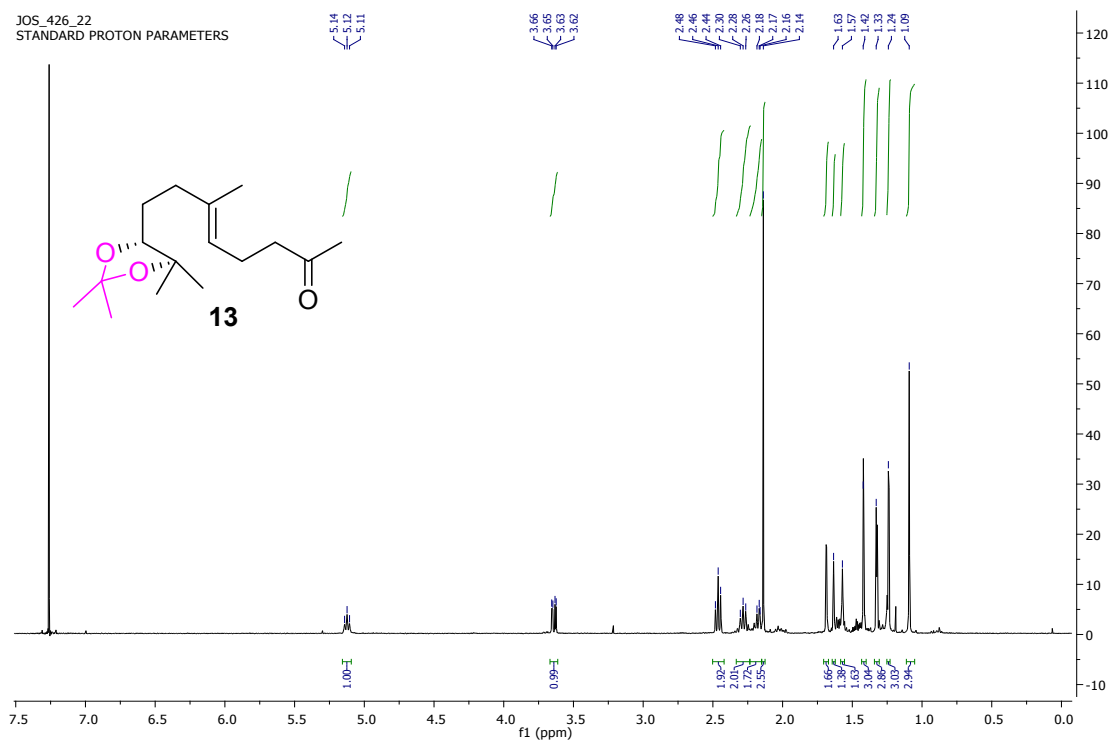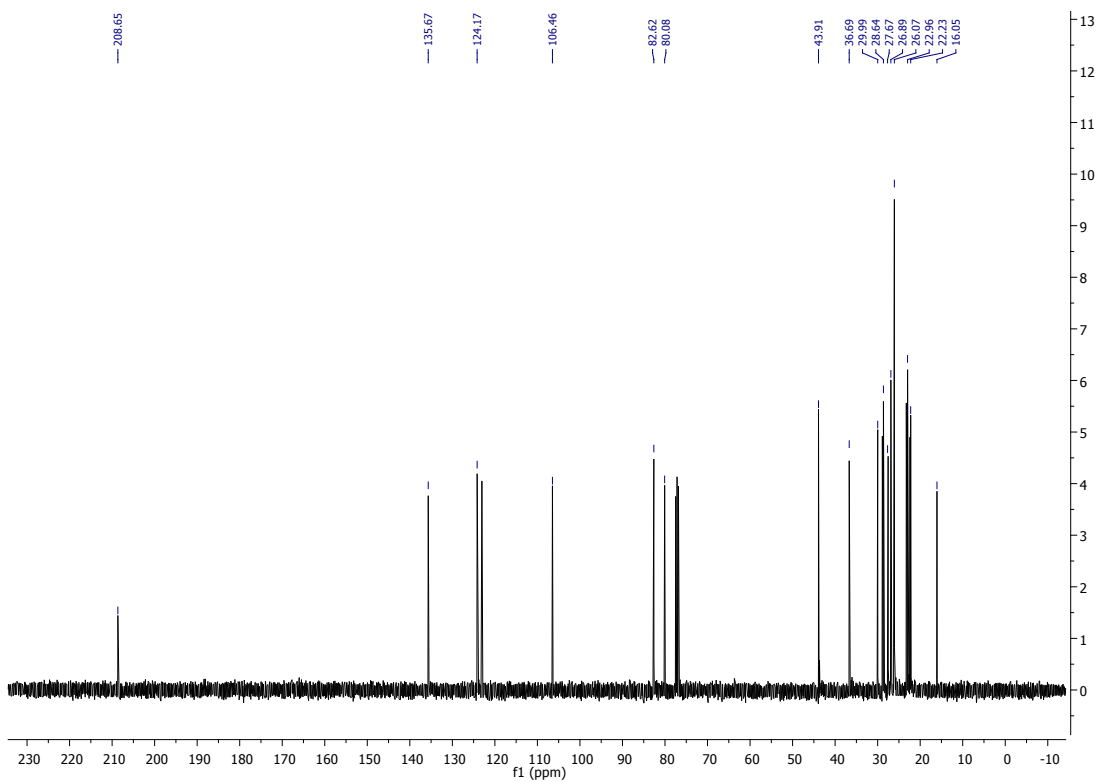

<sup>1</sup>H and <sup>13</sup>C NMR spectra of **14**

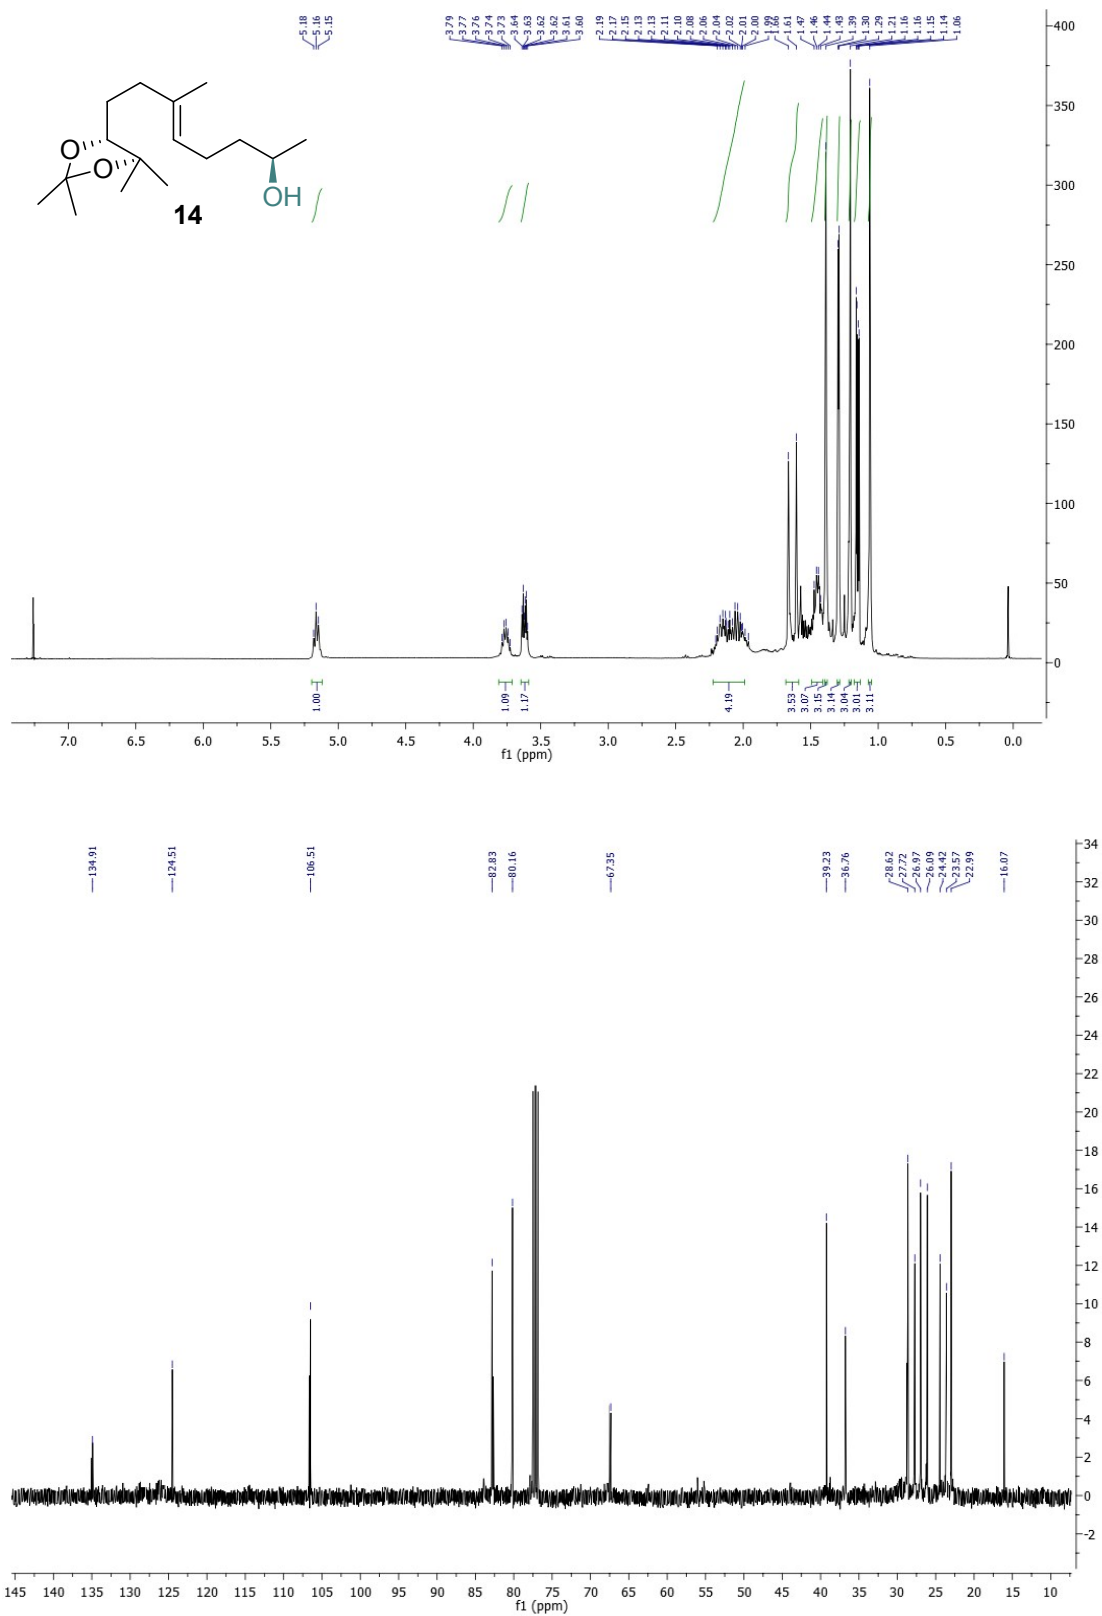

# <sup>1</sup>H and <sup>13</sup>C NMR spectra of **15**

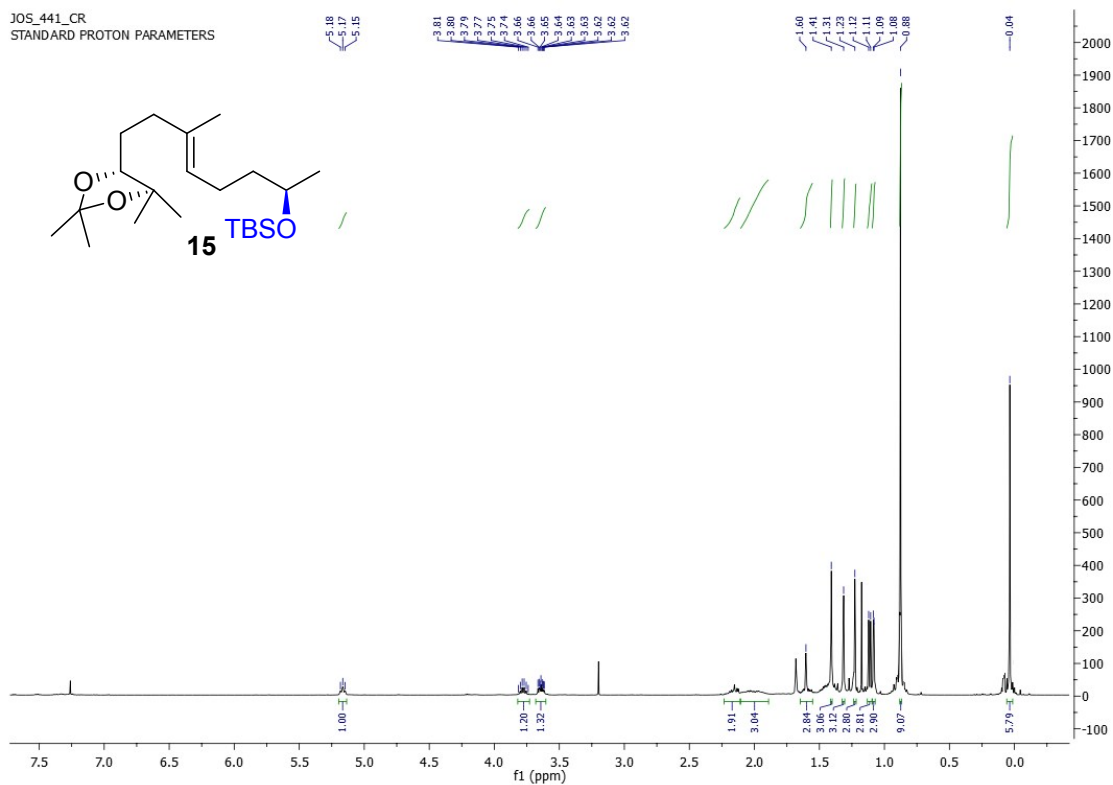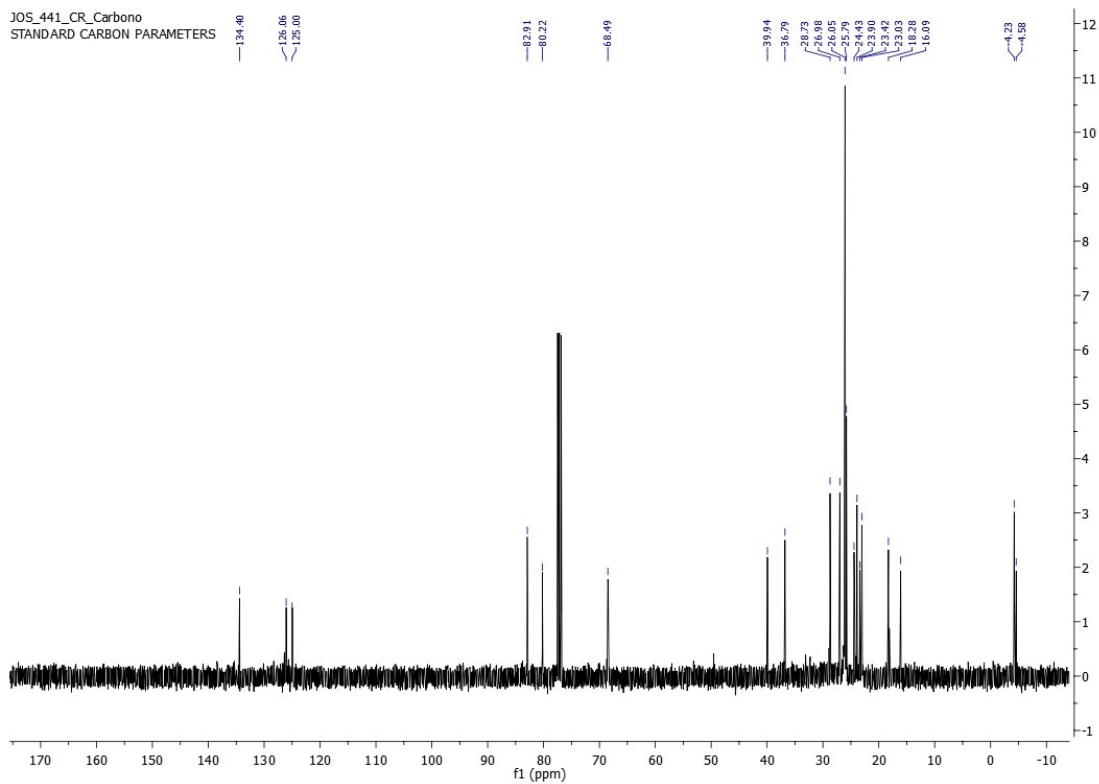

# $^1\text{H}$ and $^{13}\text{C}$ NMR spectra of **7**

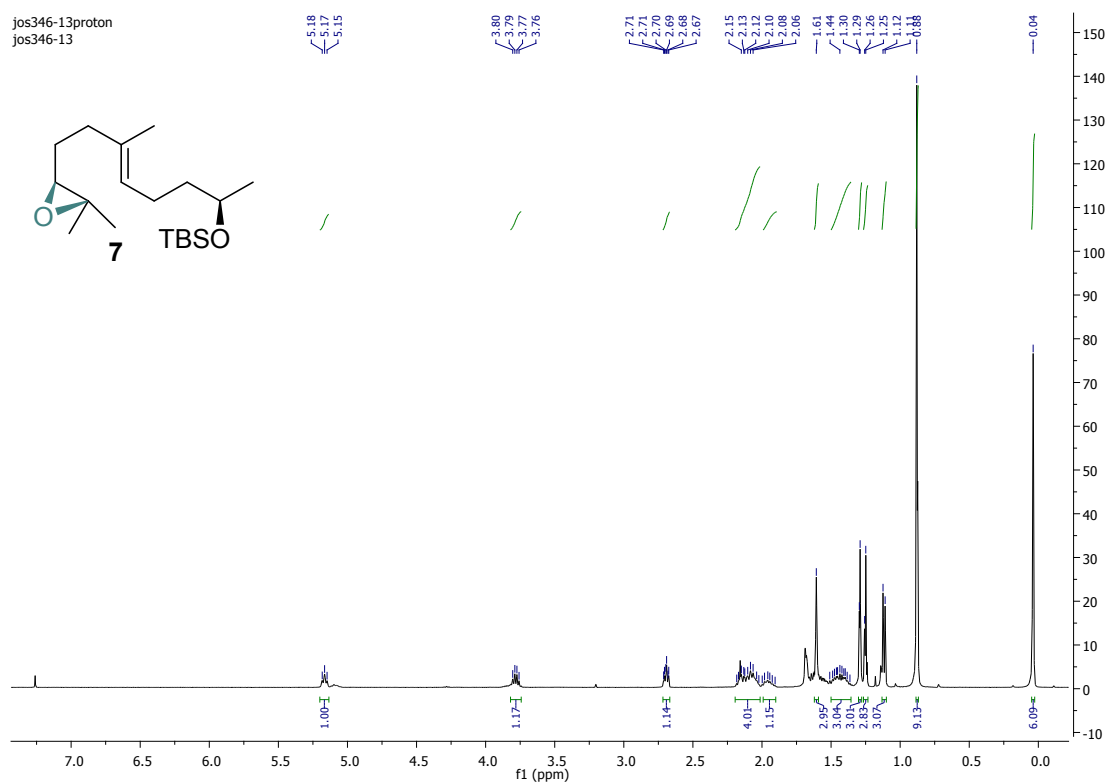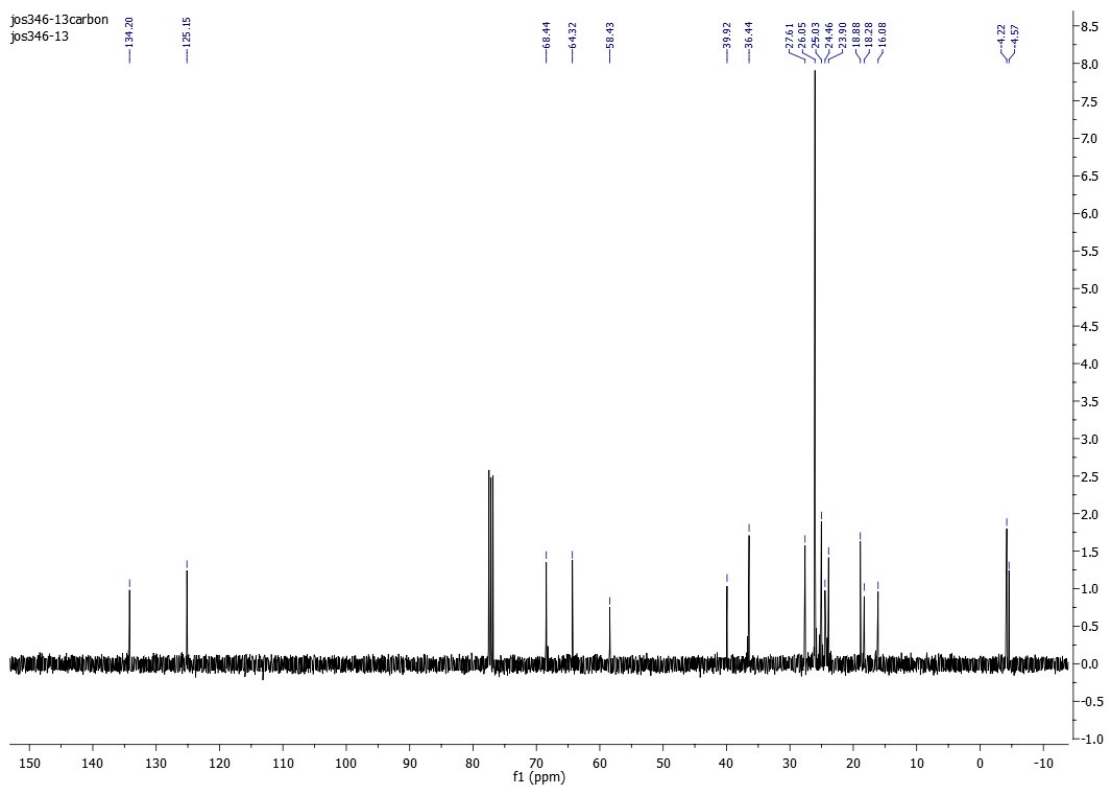

# $^1\text{H}$ and $^{13}\text{C}$ NMR spectra of **9**

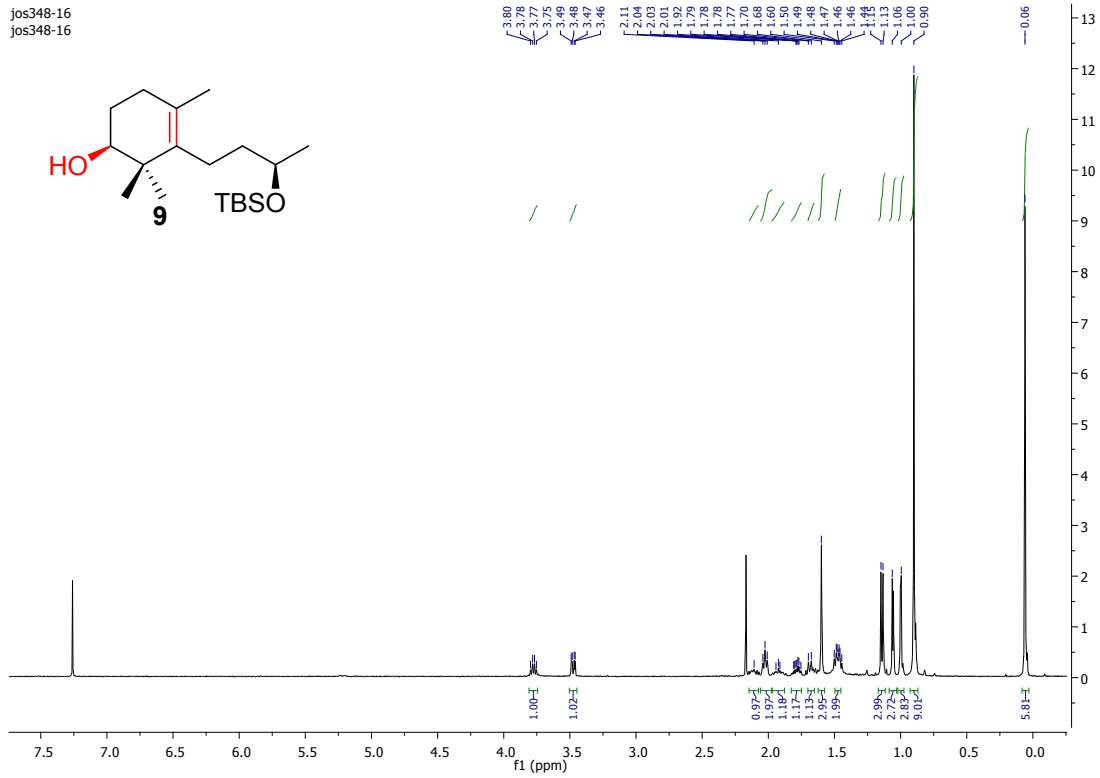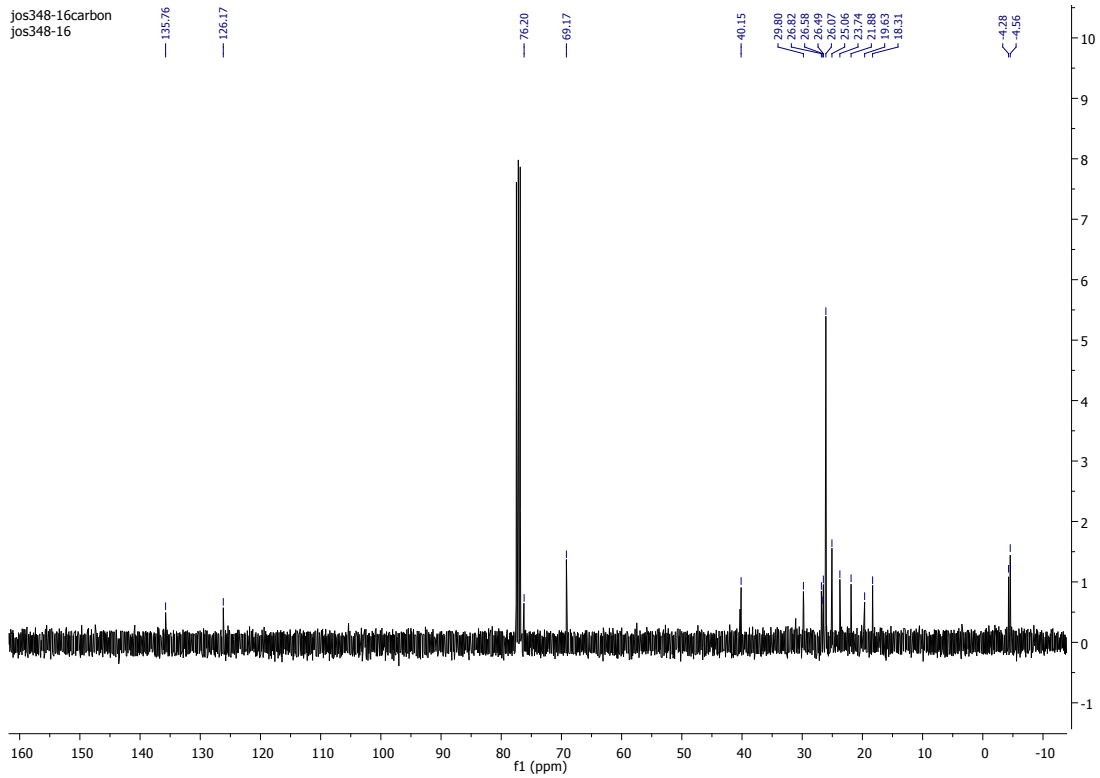



# $^1\text{H}$ and $^{13}\text{C}$ NMR spectra of Tectoionol B

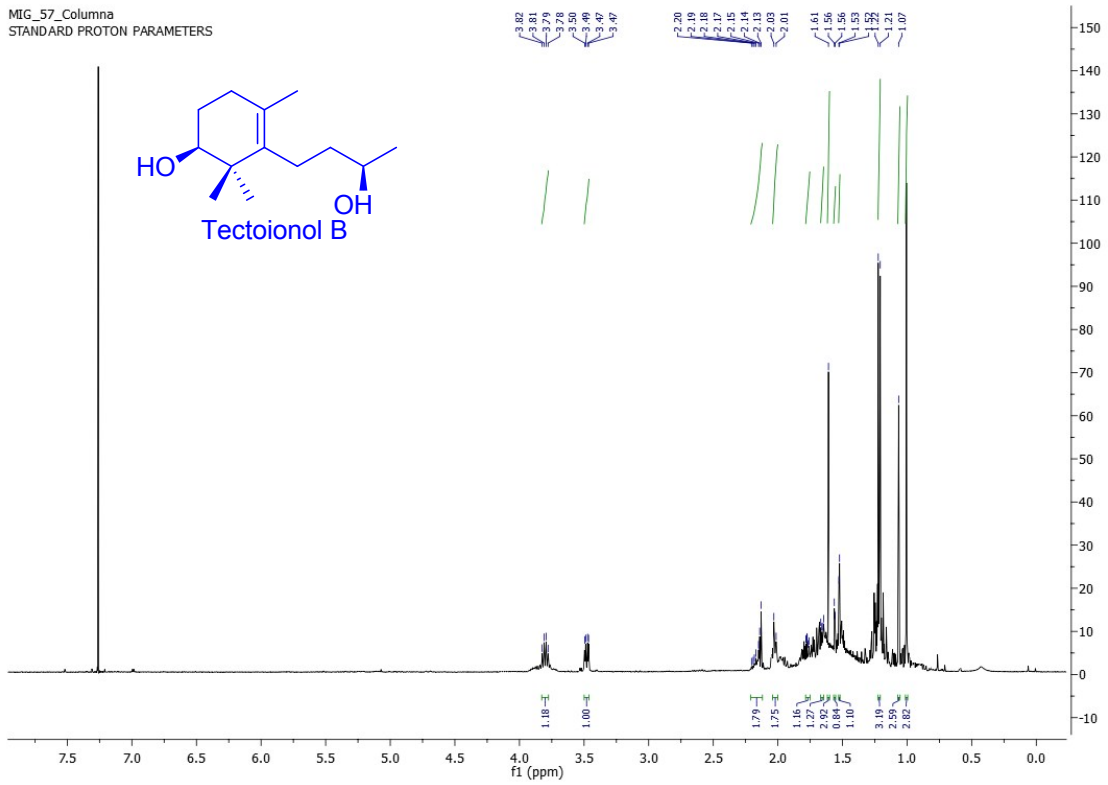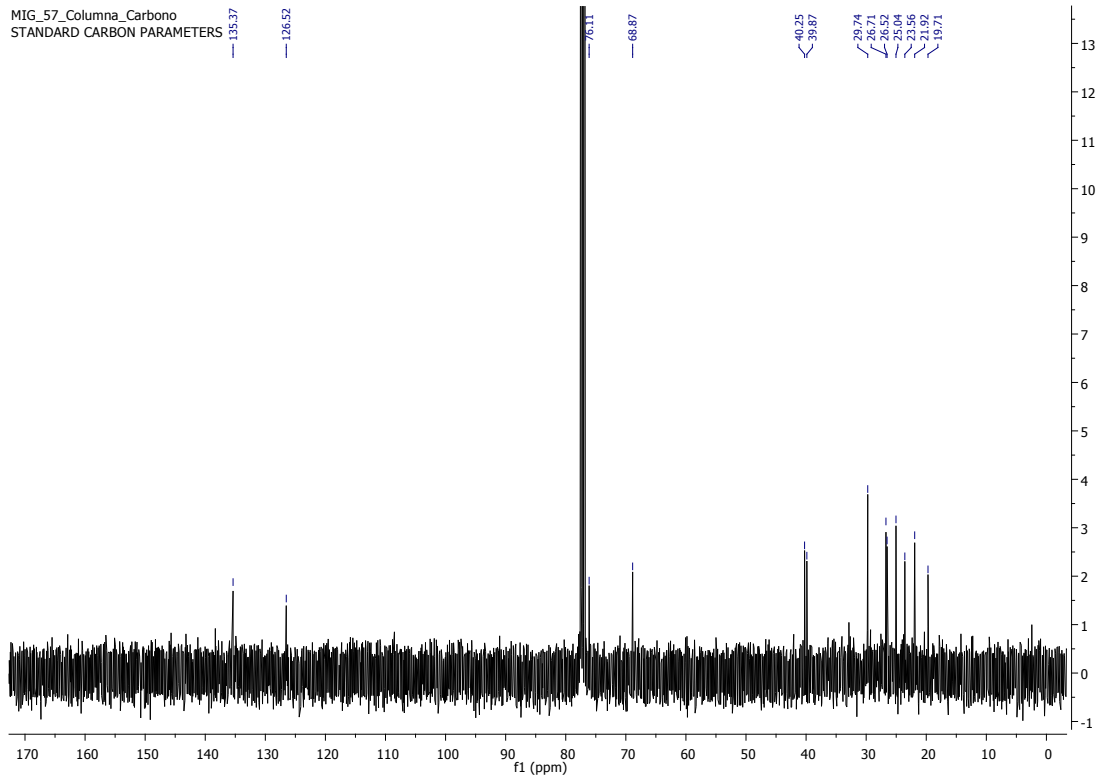

Supplement: c6ob02587k1.pdf [file c6ob02587k1.pdf]
